# Supplementary material
Source: ML conference proceedings conference paper supplement (https://proceedings.mlr.press/v54/chang17a.html)
Supplement: Supplementary file [file chang17a-supp.pdf]

# Supplementary Material: Clustering from Multiple Uncertain Experts

## 1 Results on *Dermatology*, *Glass*, *Heart*

### 1.1 Case 1: Unequal Accuracies

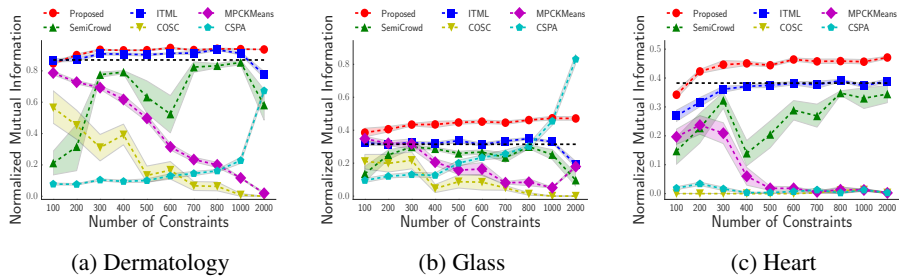

Figure 1: After setting accuracy parameter  $\alpha = \beta = (0.95, 0.85, 0.75, 0.65, 0.55)$  to make different experts have unequal accuracies, each plot shows NMI against the number of constraints for competing approaches on one UCI dataset.

### 1.2 Case 2: Equal Accuracies

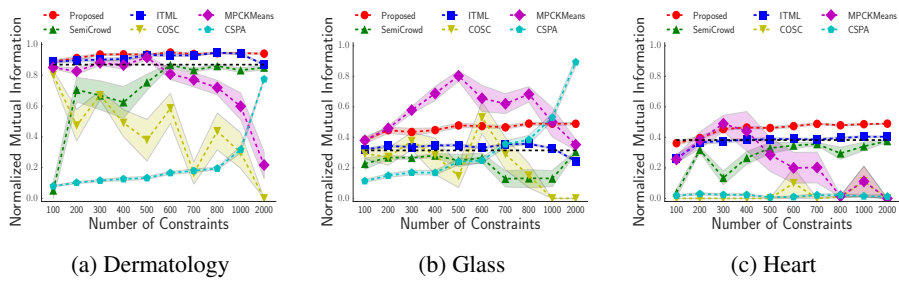

Figure 2: After setting accuracy parameter  $\alpha = \beta = (0.9, 0.9, 0.9, 0.9, 0.9)$  to make different experts have equal accuracies of good quality, each plot shows NMI against the number of constraints for competing approaches on one UCI dataset.

### 1.3 Expert Weights in Case 1

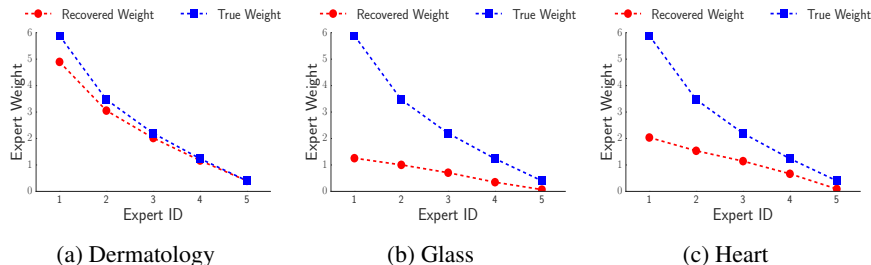

Figure 3: After setting accuracy parameter  $\alpha = \beta = (0.95, 0.85, 0.75, 0.65, 0.55)$  to make different experts have unequal accuracies, each plot shows the recovered expert weights (in red) and true expert weights (in blue) for all experts on a UCI dataset.

## 2 Parameter Settings

All approaches need to specify  $K$ , the number of clusters. For UCI benchmark datasets, we set  $K$  to be the number of classes. For the COPD dataset, we set  $K = 4$  according to a recent study on COPD subtyping [2].

**Proposed:** We set  $\lambda = 10^{-3}$  in all experiments and observe that the results are very stable for a wide range of values of  $\lambda$  (from  $10^{-5}$  to  $10^{-1}$ ).

**SemiCrowd:** We set  $d_0, d_1$ , two thresholds used to filter out uncertain sample pairs in the average similarity matrix, are set to be 0 and 0.8 respectively.

**ITML:** As is suggested by the author [3], we set lower and upper bounds associated with the constraint terms to be the 5<sup>th</sup> and 95<sup>th</sup> percentiles of the observed distribution of distances between pairs of points within the dataset.

**COSC:** We use a Gaussian kernel to construct the similarity matrix and set the scale parameter to be the median of pairwise Euclidean distances [4]. After specifying the constraints, we directly run the author’s MATLAB implementation [6].

**MPCKMeans:** We specify the constraints according to the instructions listed on the author’s website and directly run the author’s Java implementation [1].

**CSPA:** After computing the average similarity matrix, we use spectral clustering [5] to obtain the cluster labels.

## 3 Complexity Analysis

The time complexity of the optimization algorithm is dominated by gradient computation w.r.t.  $W$  and  $\mathbf{b}$ , which can be written as  $\mathcal{O}((K + M)l^2 + Kld)$ , where  $K$  is the number of clusters,  $M$  is the number of experts,  $d$  is the number of features in the data matrix,  $l$  is the number of samples provided with constraints by the experts, therefore  $l$  is upper bounded by  $\min(2c, n)$ , where  $c$  is the number of constraints and  $n$  is the number of samples. When the number of constraints grows large enough to cover all the samples in the dataset, the time complexity becomes quadratic w.r.t sample size  $n$ .

The space complexity involves the data matrix  $X \in \mathbb{R}^{n \times d}$ , experts' constraints stored in sparse matrices with cost  $\mathcal{O}(cM)$ , square matrix  $\gamma \in \mathbb{R}^{l \times l}$ . Therefore, the space complexity is at the scale  $\mathcal{O}(nd + cM + l^2)$ . When the number of constraints grows large enough to cover all the samples in the dataset, the space complexity becomes quadratic w.r.t sample size  $n$ .

## References

- [1] M. Bilenko. Mpckmeans implementation, 2004.
- [2] P. J. Castaldi, J. Dy, J. Ross, Y. Chang, G. R. Washko, D. Curran-Everett, A. Williams, D. A. Lynch, B. J. Make, J. D. Crapo, et al. Cluster analysis in the copdgene study identifies subtypes of smokers with distinct patterns of airway disease and emphysema. *Thorax*, 2014.
- [3] J. V. Davis, B. Kulis, P. Jain, S. Sra, and I. S. Dhillon. Information-theoretic metric learning. In *ICML*, pages 209–216. ACM, 2007.
- [4] K. Fukumizu, A. Gretton, X. Sun, and B. Schölkopf. Kernel measures of conditional dependence. In *NIPS*, volume 20, pages 489–496, 2007.
- [5] A. Y. Ng, M. I. Jordan, Y. Weiss, et al. On spectral clustering: Analysis and an algorithm. *NIPS*, 2:849–856, 2002.
- [6] S. Rangapuram. Cosc implementation, 2012.
